CORRECTION

# Correction: First Shark from the Late Devonian (Frasnian) Gogo Formation, Western Australia Sheds New Light on the Development of Tessellated Calcified Cartilage

**John A. Long, Carole J. Burrow, Michal Ginter, John G. Maisey, Kate M. Trinajstic, Michael I. Coates, Gavin C. Young, Tim J. Senden**

The affiliation for the third author is incorrect. Michal Ginter is not affiliated with the Paleontology Section but with the Faculty of Geology, University of Warsaw, Warsaw, Poland.

## Reference

1. Long JA, Burrow CJ, Ginter M, Maisey JG, Trinajstic KM, Coates MI, et al. (2015) First Shark from the Late Devonian (Frasnian) Gogo Formation, Western Australia Sheds New Light on the Development of Tessellated Calcified Cartilage. PLoS ONE 10(5): e0126066. doi: [10.1371/journal.pone.0126066](https://doi.org/10.1371/journal.pone.0126066) PMID: [26020788](https://pubmed.ncbi.nlm.nih.gov/26020788/)

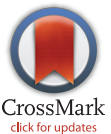

## OPEN ACCESS

**Citation:** Long JA, Burrow CJ, Ginter M, Maisey JG, Trinajstic KM, Coates MI, et al. (2015) Correction: First Shark from the Late Devonian (Frasnian) Gogo Formation, Western Australia Sheds New Light on the Development of Tessellated Calcified Cartilage. PLoS ONE 10(6): e0131502. doi:10.1371/journal.pone.0131502

**Published:** June 22, 2015

**Copyright:** © 2015 Long et al. This is an open access article distributed under the terms of the [Creative Commons Attribution License](https://creativecommons.org/licenses/by/4.0/), which permits unrestricted use, distribution, and reproduction in any medium, provided the original author and source are credited.
